# Supplementary material for: Evolutionary Conservation of Five Pax6 Homologs under Strong Purifying Selection in the Horseshoe Crab Species Cluster
Source: Preprints.org preprint supplement (doi:10.20944/preprints202309.0246.v1), 2023-09-05
Supplement: Supplementary file 2 [file supplementary]

Archive with 5 entries (5 files):
- Text document S3_ Protein sequences.docx
- Table S2_ dN_dS values.xlsx
- Table S1_ Genomic locations of xiphosuran Pax6 homologs.xlsx
- Text document S1_ Protein sequence alignment.docx
- Text document S2_ Annotated xiphosuran Pax6 loci.zip
