# Supplementary material for: Evolutionary Conservation of Five Pax6 Homologs under Strong Purifying Selection in the Horseshoe Crab Species Cluster
Source: Preprints.org preprint supplement (doi:10.20944/preprints202309.0246.v1), 2023-09-05
Supplement: Supplementary file 2 [file supplementary › Table S1_ Genomic locations of xiphosuran Pax6 homologs.xlsx]

## Sheet: Sheet1
Species	Homolog	Protein ID	Locus	Contig	5'	3'	|5'-3'|	DNA/mRNA Sequence
Tachypleus tridentatus	Ey 1		QXHF01014388 76914 bp	BBG1 scaffold1573	2012902	1935985	76917
Tachypleus tridentatus	Ey 2		QXHF01022320 59217 bp	BBG1 scaffold3997	2732433	2673215	59218
Tachypleus tridentatus	Ey 3		QXHF01007861 44478 bp	BBG1 scaffold2275	1083797	1039228	44569
Tachypleus tridentatus	Toy 1		QXHF01007346 25151 bp	BBG1 scaffold1101	1648545	1673695	25150
Tachypleus tridentatus	Toy 2		QXHF01014064 25787 bp	BBG1 scaffold627665	459196	433410	25786
Tachypleus gigas	Ey 1		CM024338 76030 bp	IMCB_SINCHF_001 chromosome 1	78010480	78086509	76029
Tachypleus gigas	Ey 2		CM024341 53767 bp	IMCB_SINCHF_001 chromosome 4	96662058	96715824	53766
Tachypleus gigas	Ey 3		CM024341 41864 bp	IMCB_SINCHF_001 chromosome 4	60556127	60514264	41863
Tachypleus gigas	Toy 1		CM024343 26442 bp	IMCB_SINCHF_001 chromosome 6	19625473	19651914	26441
Tachypleus gigas	Toy 2		CM024339 23136 bp	IMCB_SINCHF_001 chromosome 2	163553985	163577120	23135
Limulus polypemus	Ey 1	XP_022246884	LOC106463340	NW_013665662	1004618	1132350	127732
Limulus polypemus	Ey 2	XP_022239030	LOC106457408	NW_013665937	196271	291683	95412
Limulus polypemus	Ey 3	XP_013784383, XP_022252542	LOC106468499, LOC106468500	NW_013668638	47063	89297	42234
Limulus polypemus	Toy 1	XP_022240121	LOC106476859	NW_013665769	166194	217337	51143
Limulus polypemus	Toy 2		LOC106458267	NW_013666047	175021	210941	35920
Carcinoscorpius rotundicauda	Ey 1		CM022392 71076 bp	IMCB_SINMHF_001 chromosome 2	76309935	76381010	71075
Carcinoscorpius rotundicauda	Ey 2		CM022401 57427 bp	IMCB_SINMHF_001 chromosome 11	58251980	58309406	57426
Carcinoscorpius rotundicauda	Ey 3		CM022397 42603 bp	IMCB_SINMHF_001 chromosome 7	58514235	58471633	42602
Carcinoscorpius rotundicauda	Toy 1		WCHO01004207 29493 bp	OT-2019 Sc28yqQ_4222	31814460	31843952	29492
Carcinoscorpius rotundicauda	Toy 2		CM022391 24298 bp	IMCB_SINMHF_001 chromosome 1	183591932	183616229	24297
