# Supplementary material for: Evolutionary Conservation of Five Pax6 Homologs under Strong Purifying Selection in the Horseshoe Crab Species Cluster
Source: Preprints.org preprint supplement (doi:10.20944/preprints202309.0246.v1), 2023-09-05
Supplement: Supplementary file 2 [file supplementary › Table S2_ dN_dS values.xlsx]

## Sheet: Sheet1
	Toy1
	Node#	Ka/Ks Branch1	Ka Branch1	Ks Branch1	Ka/Ks Branch2	Ka Branch2	Ks Branch2
	1	0	0	0.0449519	0.0608337	0.00206346	0.0339197
	2	0.1038	0.0011534	0.0111067	0.0812117	0.00321979	0.0396468
	3	0.1301	0.0100289	0.077074	0.1233	0.00936879	0.0760105
	Toy2
	Node#	Ka/Ks Branch1	Ka Branch1	Ks Branch1	Ka/Ks Branch2	Ka Branch2	Ks Branch2
	1	0.1167	0.00614816	0.0526656	0.1299	0.00567375	0.0436931
	2	0.1336	0.00265076	0.0198369	0.1119	0.00585365	0.0523103
	3	0.1009	0.0105439	0.1045	0.0973199	0.00981831	0.1009
	Ey1
	Node#	Ka/Ks Branch1	Ka Branch1	Ks Branch1	Ka/Ks Branch2	Ka Branch2	Ks Branch2
	1	0	0	0.0193785	0	0	0.00958821
	2	0	0	0.00384316	0	0	0.0142945
	3	0.0508553	0.00433459	0.0852338	0.0461686	0.0039624	0.0858247
	Ey2
	Node#	Ka/Ks Branch1	Ka Branch1	Ks Branch1	Ka/Ks Branch2	Ka Branch2	Ks Branch2
	1	0.2591	0.00504489	0.0194719	0.1866	0.00255818	0.0137062
	2	0.1691	0.00167504	0.00990347	0.4187	0.00555095	0.0132569
	3	0.1409	0.0102724	0.0729087	0.1407	0.0100694	0.0715716
	Ey3
	Node#	Ka/Ks Branch1	Ka Branch1	Ks Branch1	Ka/Ks Branch2	Ka Branch2	Ks Branch2
	1	0.0973511	0.00117233	0.0120423	0.0321845	0.00091648	0.0284758
	2	0	0	0.00880289	0.052288	0.00209011	0.0399731
	3	0.0330622	0.00287914	0.0870827	0.0339041	0.00287296	0.0847379
