# Supplementary material for: Evolutionary Conservation of Five Pax6 Homologs under Strong Purifying Selection in the Horseshoe Crab Species Cluster
Source: Preprints.org preprint supplement (doi:10.20944/preprints202309.0246.v1), 2023-09-05
Supplement: Supplementary file 2 [file supplementary › Text document S1_ Protein sequence alignment.docx]

Mmus_Pax6_NP_03 MQ----------------------NSHSGVNQLGGVFVNGRPLPDSTRQKIVELAHSGARPCD

Tcas_toy_EFA028 MPHKEEDLMHHASMGQNTIFGCSTAGHSGINQLGGVYVNGRPLPDSTRQKIVELAHSGARPCD

Ptep_toy_XP_042 MPHK---------------------GHSGINQLGGVYVNGRPLPDSTRQKIVELAHSGARPCD

**Lpol_toy1_XP_01 MPHK---------------------GHSGVNQLGGVYVNGRPLPDSTRQKIVELAHSGARPCD**

**Crot_Toy1_Sc28y MPHK---------------------GHSGVNQLGGVYVNGRPLPDSTRQKIVELAHSGARPCD**

**Tgig_Toy1_IMCBc MPHK---------------------GHSGVNQLGGVYVNGRPLPDSTRQKIVELAHSGARPCD**

**Ttri_Toy1_BBG1s MPHK---------------------GHSGVNQLGGVYVNGRPLPDSTRQKIVELAHSGARPCD**

Lpol_toy2_XP_02 MPHK---------------------SHSGVNQLGGMYVNGRPLPDSTRQKIVELAHSGARPCD

Crot_Toy2_IMCBc MPHK---------------------GHSGVNQLGGMYVNGRPLPDSTRQKIVELAHSGARPCD

Tgig_Toy2_IMCBc MPHK---------------------GHSGVNQLGGMYVNGRPLPDSTRQKIVELAHSGARPCD

Ttri_Toy2_BBG1s MPHK---------------------GHSGVNQLGGMYVNGRPLPDSTRQKIVELAHSGARPCD

Tcas_ey_XP_0081 MAHK-------------------GKGHSGVNQLGGVFVSGRPLPDSTRQKIVELAHSGARPCD

Ptep_ey_XP_0159 MPHKDSRRSVYSPIPLIAV---QDPGHSGINQLGGVYVNGRPLPDSTRQKIVELAHSGARPCD

**Lpol_ey1_XP_022 MPHKDFDPCRPGPLLQSSV---SDPGHSGINQLGGIYVNGRPLPDSTRQKIVELAHSGARPCD**

**Crot_Ey1_IMCBch MPHKDFDPCRPGPLRQSSV---SDPGHSGINQLGGIYVNGRPLPDSTRQKIVELAHSGARPCD**

**Tgig_Ey1_IMCBch MPHKDFDPCRPGPLRQSSV---SDPGHSGINQLGGIYVNGRPLPDSTRQKIVELAHSGARPCD**

**Ttri_Ey1_BBG1sc MPHKDFDPCRPGPLRQSSV---SDPGHSGINQLGGIYVNGRPLPDSTRQKIVELAHSGARPCD**

Lpol_ey2_XP_022 MPHKDFDPCRPGPLRQSSI---TDPGHSGINQLGGIYVNGRPLPDSTRQKIVELAHSGARPCD

Crot_Ey2_IMCBch MPHKDFDPCRPGPLCQSSI---TDPGHSGINQLGGIYVNGRPLPDSTRQKIVELAHSGARPCD

Tgig_Ey2_IMCBch MPHKDFDPCRPDPLRQSSI---ADPGHSGINQLGGIYVNGRPLPDSTRQKIVELAHSGARPCD

Ttri_Ey2_BBG1sc MPHKDFDPCRPGPLRQSSI---ADPGHSGINQLGGIYVNGRPLPDSTRQKIVELAHSGARPCD

**Lpol_ey3_XP_013 MLL-------------------FPPGHSGINQLGGIYVNGRPLPDSTRQKIVELAHSGARPCD**

**Crot_Ey3_IMCBch MLL-------------------FPPGHSGINQLGGIYVNGRPLPDSTRQKIVELAHSGARPCD**

**Tgig_Ey3_IMCBch MLL-------------------FPPGHSGINQLGGIYVNGRPLPDSTRQKIVELAHSGARPCD**

**Ttri_Ey3_BBG1sc MLL-------------------FPPGHSGINQLGGIYVNGRPLPDSTRQKIVELAHSGARPCD**

cons * .***:*****::*.************************

Mmus_Pax6_NP_03 ISRILQTHADAKVQVLDNENVSNGCVSKILG-------RYYETGSIRPRAIGGSKPRVATPEV

Tcas_toy_EFA028 ISRILQ--------------VSNGCVSKILG-------RYYETGSIKPRAIGGSKPRVATQPV

Ptep_toy_XP_042 ISRILQ--------------VSNGCVSKILG-------RYYETGSIKPRAIGGSKPRVATPHV

**Lpol_toy1_XP_01 ISRILQ--------------VSNGCVSKILG-------RYYETGSIKPRTIGGSKPRVATSAV**

**Crot_Toy1_Sc28y ISRILQ--------------VSNGCVSKILG-------RYYETGSIKPRTIGGSKPRVATSTV**

**Tgig_Toy1_IMCBc ISRILQ--------------VSNGCVSKILG-------RYYETGSIKPRTIGGSKPRVATSTV**

**Ttri_Toy1_BBG1s ISRILQ--------------VSNGCVSKILG-------RYYETGSIKPRTIGGSKPRVATSTV**

Lpol_toy2_XP_02 ISRILQ--------------VSNGCVSKILG-------RYYETGSIKPRTIGGSKPRVATAAV

Crot_Toy2_IMCBc ISRILQ--------------VSNGCVSKILG-------RYYETGSIKPRTIGGSKPRVATAAV

Tgig_Toy2_IMCBc ISRILQ--------------VSNGCVSKILG-------RYYETGSIKPRTIGGSKPRVATAAV

Ttri_Toy2_BBG1s ISRILQ--------------VSNGCVSKILG-------RYYETGSIKPRTIGGSKPRVATAAV

Tcas_ey_XP_0081 ISRILQ--------------VSNGCVSKILGSCLASSPRYYETGSIRPRAIGGSKPRVATAEV

Ptep_ey_XP_0159 ISRILQ--------------VSNGCVSKILG-------RYYETGSIRPRAIGGSKPRVATPDV

**Lpol_ey1_XP_022 ISRILQ--------------VSNGCVSKILG-------RYYETGSIRPRAIGGSKPRVATPPV**

**Crot_Ey1_IMCBch ISRILQ--------------VSNGCVSKILG-------RYYETGSIRPRAIGGSKPRVATPPV**

**Tgig_Ey1_IMCBch ISRILQ--------------VSNGCVSKILG-------RYYETGSIRPRAIGGSKPRVATPPV**

**Ttri_Ey1_BBG1sc ISRILQ--------------VSNGCVSKILG-------RYYETGSIRPRAIGGSKPRVATPPV**

Lpol_ey2_XP_022 ISRILQ--------------VSNGCVSKILG-------RYYETGSIRPRAIGGSKPRVATPSV

Crot_Ey2_IMCBch ISRILQ--------------VSNGCVSKILG-------RYYETGSIRPRAIGGSKPRVATPPV

Tgig_Ey2_IMCBch ISRILQ--------------VSNGCVSKILG-------RYYETGSIRPRAIGGSKPRVATPPV

Ttri_Ey2_BBG1sc ISRILQ--------------VSNGCVSKILG-------RYYETGSIRPRAIGGSKPRVATPPV

**Lpol_ey3_XP_013 ISRILQ--------------VSNGCVSKILG-------RYYETGSIRPRAIGGSKPRVATPDV**

**Crot_Ey3_IMCBch ISRILQ--------------VSNGCVSKILG-------RYYETGSIRPRAIGGSKPRVATPDV**

**Tgig_Ey3_IMCBch ISRILQ--------------VSNGCVSKILG-------RYYETGSIRPRAIGGSKPRVATPDV**

**Ttri_Ey3_BBG1sc ISRILQ--------------VSNGCVSKILG-------RYYETGSIRPRAIGGSKPRVATPDV**

cons ****** *********** ********:**:********** *

Mmus_Pax6_NP_03 VSKIAQYKRECPSIFAWEIRDRLLSEGVCTNDNIPSVSSINRVLRNLASEKQQM---------

Tcas_toy_EFA028 VNKIAEFKRECPSIFAWEIRDRLLSEGVCNNDNIPSVSSINRVLRNLASQKEQQASA------

Ptep_toy_XP_042 VAKIADYKRECPSIFAWEIRDRLLSEGVCNNDNIPSVSSINRVLRNLAAQKEQQQQHHQHQLT

**Lpol_toy1_XP_01 VNKIADYKRECPSVFAWEIRDRLLADGVCNSENIPSVSSINRVLRNLTSQKDQQEPSPH-HVP**

**Crot_Toy1_Sc28y VNKIADYKRECPSVFAWEIRDRLLADGVCNSENVPSVSSINRVLRNLTSQKDQQETSPH-HVP**

**Tgig_Toy1_IMCBc VNKIADYKRECPSVFAWEIRDRLLADGVCNSENVPSVSSINRVLRNLTSQKDQQETSPH-HVP**

**Ttri_Toy1_BBG1s VNKIADYKRECPSVFAWEIRDRLLADGVCNSENVPSVSSINRVLRNLTSQKDQQETSPH-HVP**

Lpol_toy2_XP_02 VNRIADYKRECPSIFAWEMRDRLLADGVCNSENIPSVSSINRVLRNLSAQKDHHQSSP--QVP

Crot_Toy2_IMCBc VNRIADYKRECPSIFAWEMRDRLLVEGVCNSENIPSVSSINRVLRNLSSQKDLHRTSP--QVS

Tgig_Toy2_IMCBc VNRIADYKRECPSIFAWEMRDRLLVEGVCNSENIPSVSSINRVLRNLSSQKDPHRTSP--QVS

Ttri_Toy2_BBG1s VNRIADYKRECPSIFAWEMRDRLLVEGVCNSENIPSVSSINRVLRNLSSQKDPHRTSP--QVS

Tcas_ey_XP_0081 VSKISSYKRECPSIFAWEIRDRLLQEGVCTNDNIPSVSSINRVLRNLAAQKEQTSQNP--PV-

Ptep_ey_XP_0159 VAKIAHFKRECPSIFAWEIRDRLLSEGACTNDSVPSVSSINRVLRNLAAQKEQA--------Q

**Lpol_ey1_XP_022 VNKIAQYKRECPSIFAWEIRDRLLSDGICNNDNVPSVSSINRVLRNLAAQKEQQ-------VH**

**Crot_Ey1_IMCBch VNKIAQYKRECPSIFAWEIRDRLLSEGICNNDNVPSVSSINRVLRNLAAQKEQQ-------VH**

**Tgig_Ey1_IMCBch VNKIAQYKRECPSIFAWEIRDRLLSEGICNNDNVPSVSSINRVLRNLAAQKEQQ-------VH**

**Ttri_Ey1_BBG1sc VNKIAQYKRECPSIFAWEIRDRLLSEGICNNDNVPSVSSINRVLRNLAAQKEQQ-------VH**

Lpol_ey2_XP_022 VAKIAHYKRECPSIFAWEIRDRLLSDGVCNNDNVPSVSSINRVLRNLAAKKEQQ---------

Crot_Ey2_IMCBch VAKIAHYKRECPSIFAWEIRDRLLSDGVCSNDNVPSVSSINRVLRNLAAKKEQQ---------

Tgig_Ey2_IMCBch VAKIAHYKRECPSIFAWEIRDRLLSDGVCSNDNVPSVSSINRVLRNLAAKKEQQ---------

Ttri_Ey2_BBG1sc VAKIAHYKRECPSIFAWEIRDRLLSDGVCSNDNVPSVSSINRVLRNLAAKKEQQ---------

**Lpol_ey3_XP_013 VSNIAQYKRECPSIFAWEIRDRLLSDGICTNDNVPSVSSINRVLRNLAAQKEQH-------VH**

**Crot_Ey3_IMCBch VSNIAQYKRECPSIFAWEIRDRLLSDGICTNDNVPSVSSINRVLRNLAAQKEQH-------VQ**

**Tgig_Ey3_IMCBch VSNIAQYKRECPSIFAWEIRDRLLSDGICTNDNVPSVSSINRVLRNLAAQKEQH-------VQ**

**Ttri_Ey3_BBG1sc VSNIAQYKRECPSIFAWEIRDRLLSDGICTNDNVPSVSSINRVLRNLAAQKEQH-------VQ**

cons * .*: :******:****:***** :* *..:.:*************:::*:

Mmus_Pax6_NP_03 --GADGMYDKLRMLNGQ-TGSWGTR-PGWYPGTSV----------------------------

Tcas_toy_EFA028 --QNESVYDKLRMFNGQ------TPGWAWYPGTPTA-PHLGLPPAPAALTTQI----------

Ptep_toy_XP_042 VPGAELVYDKLRMLNGG------QP-WPWYHTGASHLTAAGVPHGTSPAGLSAAAAAAAAATG

**Lpol_toy1_XP_01 MTGPESVYDKLRLLNGS------QP-WPWYPTGPTH-HFHGIPPTSSPVALGQNAGLVGP---**

**Crot_Toy1_Sc28y MTGPESVYDKLRLLNGS------QP-WPWYPTGPSH-HFHGIPPTSSSVALGQNAGLMGP---**

**Tgig_Toy1_IMCBc MTGPESVYDKLRLLNGS------QP-WPWYPTGPSH-HFHGIPPTSSPVALGQNAGLMGP---**

**Ttri_Toy1_BBG1s MTGPESVYDKLRLLNGS------QP-WPWYPTGPSH-HFHGIPPTSSPVALGQNAGLMGP---**

Lpol_toy2_XP_02 MTGPESVYDKLRMLNGA------QP-WPWYPTGTSH-HFHGVPPPSSPVTLGPNTGLGGS---

Crot_Toy2_IMCBc MAGPETVYDKLRMLNGT------QP-WPWYPTGTSH-HFHGVPPPSSPVTLGPNTGLGGS---

Tgig_Toy2_IMCBc VGGPESVYDKLRMLNGA------QP-WPWYPTGTSH-HFHGVPPPSSPVTLGPNTGLGGS---

Ttri_Toy2_BBG1s MAGPETVYDKLRMLNGA------QP-WPWYPTATSH-HFHGVPPPSSPVTLGPNTGLGVS---

Tcas_ey_XP_0081 SSGNDSVYDKLRLLNGNQG--SWRP-TPWYSPGNT---SFPLQP-------------------

Ptep_ey_XP_0159 VQAQDAVYDKLRMLNGQ-G--WPRP-NPWYPGGTT---FGGIAP-------------------

**Lpol_ey1_XP_022 AQAQDAVYDKLRILNGQ-G--WPRP-NPWYPGSAT---FGGITS-------------------**

**Crot_Ey1_IMCBch AQAQDAVYDKLRILNGQ-G--WPRP-NPWYPGSAT---FGGITP-------------------**

**Tgig_Ey1_IMCBch AQAQDAVYDKLRILNGQ-G--WPRP-NPWYPGSAT---FGGITP-------------------**

**Ttri_Ey1_BBG1sc AQAQDAVYDKLRILNGQ-G--WPRP-NPWYPGSAT---FGGITP-------------------**

Lpol_ey2_XP_022 --AQDTVYDKLRLLNGQ-A--WPRP-NPWYPGSAT---FGGITP-------------------

Crot_Ey2_IMCBch --AQDTVYDKLRLLNGQ-G--WPRP-NPWYPGSAT---FGGITP-------------------

Tgig_Ey2_IMCBch --TQDTVYDKLRLLNGQ-G--WPRP-NPWYPGSAT---FGGITP-------------------

Ttri_Ey2_BBG1sc --AQDTVYDKLRLLNGQ-G--WPRP-NPWYPGSAT---FGGITP-------------------

**Lpol_ey3_XP_013 --AQDAVYDKLRMLNGQ-G--WPRP-NPWYPASAT---FGGITP-------------------**

**Crot_Ey3_IMCBch AQAQDAVYDKLRMLNGQ-G--WPRP-NPWYPASAT---FGGLTP-------------------**

**Tgig_Ey3_IMCBch AQAQDAVYDKLRMLNGQ-G--WPRP-NPWYPASAT---FGGLTP-------------------**

**Ttri_Ey3_BBG1sc AQAQDAVYDKLRMLNGQ-G--WPRP-NPWYPASAT---FGGLTP-------------------**

cons : :*****::** **

Mmus_Pax6_NP_03 ---------PGQPTQ------DGCQQQEGG--GENTNSISSNG-E-D-SDEAQMRLQLKRKLQ

Tcas_toy_EFA028 ------------------ARDDLQK-RADAMHENTSDGNSEHNSS-G-DEDSQLRLRLKRKLQ

Ptep_toy_XP_042 GLVPPVVSSAGLGVCNGQHNGSDSSAKKSV-NEATSDGNSENNSS-A-DEDSQMRMRLKRKLQ

**Lpol_toy1_XP_01 --VHGGNGHPSLAACESHRQDHPSV-KKDS-IDATSDGNSENNSS-A-DEDSQLRMRLKRKLQ**

**Crot_Toy1_Sc28y --GHGGNSHLGLSACESHRQDHPSV-KKDS-IDATSDGNSENNSS-A-DEDSQLRMRLKRKLQ**

**Tgig_Toy1_IMCBc --GHGGNSHLGLAACESHRQDHPSV-KKDS-IDATSDGNSENNSS-A-DEDSQLRMRLKRKLQ**

**Ttri_Toy1_BBG1s --GHGGNSHLGLAACESHRQDHPRV-KKDS-IDATSDGNSENNSS-A-DEDSQLRMRLKRKLQ**

Lpol_toy2_XP_02 --VPIVNGHSSLGSCDSHRHDHMSVTKKDS-IDATSDGNSENNSS-A-DEDSQLRMRLKRKLQ

Crot_Toy2_IMCBc --VPIGNGHSSIGSCETNRHDHVNVTKKGS-IDATSDGNSENNSS-A-DEDSQLRMRLKRKLQ

Tgig_Toy2_IMCBc --VPIGNGHSSLGVCESNRHDHMNVTKKGS-IDATSDGNSENNSS-A-DEDSQLRMRLKRKLQ

Ttri_Toy2_BBG1s --VPIGNGHSSLGSCESNRHDHMHVTKKGS-IDATSDGNSENNSS-A-DEDSQLRMRLKRKLQ

Tcas_ey_XP_0081 LSPPPTILADDINKK------VTDLDGINS-DETNSGDNSNAGSSIG-PDDDQARLRLKRKLQ

Ptep_ey_XP_0159 SYIA-PVTTPATPLE------NGLNPKKEG-SVTEASTPSDQSGS-G-EEDSAARLRLKRKLQ

**Lpol_ey1_XP_022 ACVPPPVTAPSLPTE------NGQIQKKEGDSGTESSSRSDPGGS-G-DEDNAARLRLKRKLQ**

**Crot_Ey1_IMCBch ACVPPPVTAPSLPTE------NGQIQKKEGDSGTESSSRSDPGGS-S-DEDNAARLRLKRKLQ**

**Tgig_Ey1_IMCBch ACVPPPVTAPSLPTE------NGQIQKKEGDSGTESSSRSDPGGS-S-DEDNAARLRLKRKLQ**

**Ttri_Ey1_BBG1sc ACVPPPVTAPSLPTE------NGQIQKKEGDSGTESSSRSDPGGS-S-DEDNAARLRLKRKLQ**

Lpol_ey2_XP_022 ACIPPPITASGHHSD------NGQVQKKEGDSGNDSSSRSDPGGS-G-DEDNEARLRLKRKLQ

Crot_Ey2_IMCBch ACIPPPITVSGLPSD------SGQVQKKEGGSVHDSSSRSDPGVS-G-DEENEARLRLKRKLQ

Tgig_Ey2_IMCBch ACIPPPITVSGLPSD------SGQVQKKEGDSVHDSSSRSDPGGS-G-DEENEARLRLKRKLQ

Ttri_Ey2_BBG1sc TCIPPPITVSGLPSD------SGQVQKKEGGSVHDSSSRSDPGGS-G-DEENEARLRLKRKLQ

**Lpol_ey3_XP_013 ACVPPPVTVPGLSTE------NGPIQKKEGDSGTESSSRSDPGGS-GDDEENAARLRLKRKLQ**

**Crot_Ey3_IMCBch ACVPPPVTVPGLSTE------NGPIQKKEGDSGTESSSRSDPGGS-GDDEENAARLRLKRKLQ**

**Tgig_Ey3_IMCBch ACVPPPVTVPGLSTE------NGPIQKKEGDSGTESSSRSDPGGS-GDDEENAARLRLKRKLQ**

**Ttri_Ey3_BBG1sc ACVPPPVTVPGLSTE------NGPIQKKEGDSGTESSSRSDPGGS-GDDEENAARLRLKRKLQ**

cons :. *. . . :: *::******

Mmus_Pax6_NP_03 RNRTSFTQEQIEALEKEFERTHYPDVFARERLAAKIDLPEARI-----QVWFSNRRAKWRREE

Tcas_toy_EFA028 RNRTSFTNEQIDSLEKEFERTHYPDVFARERLAEKIGLPEARI-----QVWFSNRRAKWRREE

Ptep_toy_XP_042 RNRTSFANEQIEALEKEFERTHYPDVFARERLAEKISLPEARI-----QVWFSNRRAKWRREE

**Lpol_toy1_XP_01 RNRTSFTNEQIEALEKEFERTHYPDVFARERLAEKITLPEARI-----QVWFSNRRAKWRREE**

**Crot_Toy1_Sc28y RNRTSFTNEQIEALEKEFERTHYPDVFARERLAEKVTLPEARI-----QVWFSNRRAKWRREE**

**Tgig_Toy1_IMCBc RNRTSFTNEQIEALEKEFERTHYPDVFARERLAEKVTLPEARI-----QVWFSNRRAKWRREE**

**Ttri_Toy1_BBG1s RNRTSFTNEQIEALEKEFERTHYPDVFARERLAEKVTLPEARI-----QVWFSNRRAKWRREE**

Lpol_toy2_XP_02 RNRTSFTNEQIEALEKEFERTHYPDVFARERLAEKISLPEARI-----QVWFSNRRAKWRREE

Crot_Toy2_IMCBc RNRTSFTNEQIEALEK-VERTHYPDVFARERLAEKISLPEARI-----QVWFSNRRAKWRREE

Tgig_Toy2_IMCBc RNRTSFTNEQIEALEKEFERTHYPDVFARERLAEKISLPEARI-----QVWFSNRRAKWRREE

Ttri_Toy2_BBG1s RNRTSFTNEQIEALEKEFERTHYPDVFARERLAEKISLPEARI-----QVWFSNRRAKWRREE

Tcas_ey_XP_0081 RNRTSFTNDQIDSLEKEFERTHYPDVFARERLAAKIGLPEARI-----QVWFSNRRAKWRREE

Ptep_ey_XP_0159 RNRTSFTPEQIEALEKEFERTHYPDVFARERLAAKIDLPEARI-----QVWFSNRRAKWRREE

**Lpol_ey1_XP_022 RNRTSFTPEQIEALEKEFERTHYPDVFARERLAAKIDLPEARIQAVSVQVWFSNRRAKWRREE**

**Crot_Ey1_IMCBch RNRTSFTPEQIEALEKEFERTHYPDVFARERLAAKIDLPEARIQAVSVQVWFSNRRAKWRREE**

**Tgig_Ey1_IMCBch RNRTSFTPEQIEALEKEFERTHYPDVFARERLAAKIDLPEARIQAVSVQVWFSNRRAKWRREE**

**Ttri_Ey1_BBG1sc RNRTSFTPEQIEALEKEFERTHYPDVFARERLAAKIDLPEARIQAVSVQVWFSNRRAKWRREE**

Lpol_ey2_XP_022 RNRTSFTPEQIEALEKEFERTHYPDVFARERLAAKIDLPEARIQALSVQVWFSNRRAKWRREE

Crot_Ey2_IMCBch RNRTSFTPEQIEALEKEFERTHYPDVFARERLAAKIDLPEARIQALSVQVWFSNRRAKWRREE

Tgig_Ey2_IMCBch RNRTSFTPEQIEALEKEFERTHYPDVFARERLAAKIDLPEARIQALSVQVWFSNRRAKWRREE

Ttri_Ey2_BBG1sc RNRTSFTPEQIEALEKEFERTHYPDVFARERLAAKIDLPEARIQALSVQVWFSNRRAKWRREE

**Lpol_ey3_XP_013 RNRTSFTPEQIEALEKEFERTHYPDVFARERLASKIDLPEARI-----QVWFSNRRAKWRREE**

**Crot_Ey3_IMCBch RNRTSFTPEQIEALEKEFERTHYPDVFARERLASKIDLPEARI-----QVWFSNRRAKWRREE**

**Tgig_Ey3_IMCBch RNRTSFTPEQIEALEKEFERTHYPDVFARERLASKIDLPEARI-----QVWFSNRRAKWRREE**

**Ttri_Ey3_BBG1sc RNRTSFTPEQIEALEKEFERTHYPDVFARERLASKIDLPEARI-----QVWFSNRRAKWRREE**

cons ******: :**::*** .*************** *: ****** ***************

Mmus_Pax6_NP_03 KLRNQRRQAS----------N-TPSHIPISSSFST-SVYQPIPQPTTPVSSFTSGSMLGRTDT

Tcas_toy_EFA028 KLRNQRRAVDQVGAV--SPPS-SAGRLPINSGF-N-SMYSSIPQPIA----------------

Ptep_toy_XP_042 KLRNQRRTVDQVSAS--SVATPTAGRLPLNGTFAN-TMYPSLGQPMG----------------

**Lpol_toy1_XP_01 KLRNQRRVVEQPTGT--TVLAPPNGRLPINGTFYN-SMYPSLGQPMG----------------**

**Crot_Toy1_Sc28y KLRNQRRAVEQPTGT--TVLAPPNGRLPINGTFYN-SMYPSLGQPMA----------------**

**Tgig_Toy1_IMCBc KLRNQRRVVEQPTGT--TVLAPPNGRLPINGTFYN-SMYPSLGQPMA----------------**

**Ttri_Toy1_BBG1s KLRNQRRVVEQPTGT--TVLAPPNGRLPINGTFYN-SMYPSLGQPMA----------------**

Lpol_toy2_XP_02 KLRNQRRVIEQPACT--SMLSPPNGRLPINGSFYN-SMYPSLAQPLG----------------

Crot_Toy2_IMCBc KLRNQRRVIEQPACT--SMLSPPNGRLPINGSFYN-SLYPALAQPMG----------------

Tgig_Toy2_IMCBc KLRNQRRVIEQPTCT--SMLSPPNGRLPINGSFYN-SMYPALAQPMG----------------

Ttri_Toy2_BBG1s KLRNQRRVIEQPACT--SMLSPPNGRLPINGSFYN-SMYPALAQPMG----------------

Tcas_ey_XP_0081 KLRNQRRGAPAPAEH--P--G-PAASPPRLQGFNNTSMYSPLPPPMS----------------

Ptep_ey_XP_0159 KLRNQRRAAEQAT-------T-TPGRLPLNTGFPN-SLYPSIGQPMA----------------

**Lpol_ey1_XP_022 KLRNQRRAAEQAAAA--AANT-APARLPLNAGFPN-ALYPSIGQPMA----------------**

**Crot_Ey1_IMCBch KLRNQRRAAEQAAVA--AVNT-TPARLPLNAGFPN-ALYPSIGQPMA----------------**

**Tgig_Ey1_IMCBch KLRNQRRAAEQAAVA--AVNT-TPARLPLNAGFPN-ALYPSIGQPMA----------------**

**Ttri_Ey1_BBG1sc KLRNQRRAAEQAAVA--AVNT-TPARLPLNAGFPN-ALYPSIGQPMA----------------**

Lpol_ey2_XP_022 KLRNQRRVAEQAAVAAAAANS-TPARLSLNSGFPN-ALYPGIGQPMA----------------

Crot_Ey2_IMCBch KLRNQRRVAEQAAVAAAAANS-APTRLSLNSGFPN-SLYPGIGQPMA----------------

Tgig_Ey2_IMCBch KLRNQRRVAEQAAVAAAAANS-APTRLSLNSGFPN-SLYPGIGQPMA----------------

Ttri_Ey2_BBG1sc KLRNQRRVAEQAAVAAAAANS-APTRLSLNSGFPN-SLYPGIGQPMA----------------

**Lpol_ey3_XP_013 KLRNQRRAAEQAAAAAAAVNT-TPGRLPLNSGFPN-SLYPGIGQPMA----------------**

**Crot_Ey3_IMCBch KLRNQRRAAEQAAA--A-VNN-TPGRLPLNSGFPN-SLYPGIGQPMA----------------**

**Tgig_Ey3_IMCBch KLRNQRRAAEQAAA--A-VNN-TPGRLPLNSGFPN-SLYPGIGQPMA----------------**

**Ttri_Ey3_BBG1sc KLRNQRRAAEQAAA--A-VNN-TPGRLPLNSGFPN-SLYPGIGQPMA----------------**

cons ******* . . * . ::* : *

Mmus_Pax6_NP_03 ALTNTYS--ALPPMPSFTM---AN--NLP--MQPPVPSQTS-SYSC------MLPTSP-----

Tcas_toy_EFA028 TMADTYS---SM-------------SGGL--SSSCLQQRDATGYPY------MF-------HD

Ptep_toy_XP_042 AMPDSYS---KDMSSFYSM---APVSGMT--PSSCLQQRDPGAYSY------ML-------HD

**Lpol_toy1_XP_01 GMGDSYS---MPPS-----------SSMT--SNHCLQQRDPTSYTY------MF-------HD**

**Crot_Toy1_Sc28y GMGDSYS---VPPP-----------SSIA--PNHCVQQRDPTSYTY------MF-------H-**

**Tgig_Toy1_IMCBc GMGDSYS---VPP------------SSIA--PNHCVQQRDPTSYTY------MF-------H-**

**Ttri_Toy1_BBG1s GMGDSYS---VPPP-----------SSIA--PNHCVQQRDPTSYTY------MF-------H-**

Lpol_toy2_XP_02 GMGDSYS---VPPA-----------SSVA--SNHCLQQRDPSSYTY------MF-------HD

Crot_Toy2_IMCBc GMGDSYS---VPPA-----------SSMA--SNHCLQQRDPSPYTY------MF-------HD

Tgig_Toy2_IMCBc GMGDSYS---VPPV-----------SSMA--SNHCLQQRDPSSYTY------MF-------HD

Ttri_Toy2_BBG1s GMGDSYS---VPPV-----------SSMA--SNHCLQQRDPSSYTY------MF-------HD

Tcas_ey_XP_0081 -IADTYS--SMSSMSSFNHGGLTS--SMGPSPGACLQQRESPSMGGAMSGYCMG---RPPSYD

Ptep_ey_XP_0159 SMAETYRCGTIPTMPTYS-----S--NMT--PSSCLQQQTT-SYSC------MLPPGGTRSYD

**Lpol_ey1_XP_022 SMTDTYS--SIPPMSTYSM---SN--NMG--PSSCLQQQAP-SYSC------MLPPGSARSYD**

**Crot_Ey1_IMCBch SMTDTYS--SIPPMSTYSM---SN--NMG--PSSCLQQQAP-SYSC------MLPPGSARSYD**

**Tgig_Ey1_IMCBch SMTDTYS--SIPPMSTYSM---SN--NMG--PSSCLQQQAP-SYSC------MLPPGSARSYD**

**Ttri_Ey1_BBG1sc SMTDTYS--SIPPMSTYSM---SN--NMG--PSSCLQQQAP-SYSC------MLPPGSARSYD**

Lpol_ey2_XP_022 SMTDSYS--SIPPMSTYSM---SN--NMA--PSSCLQQQTP-SYSC------MLPSGSARNYD

Crot_Ey2_IMCBch SMTDSYN--SIPPMSTYSM---SN--NMA--PSSCLQQQTP-SYSC------MLPSGNARNYD

Tgig_Ey2_IMCBch SMTDSYN--SIPPMSTYSM---SN--NIA--PSSCLQQQTP-SYSC------MLPSGSARNYD

Ttri_Ey2_BBG1sc SMTDSYN--SIPPMSTYSM---SN--NMA--PSSCLQQQTP-SYSC------MLPSGSARNYD

**Lpol_ey3_XP_013 SMGDSYS--SIPPMSTYSM---PN--NMA--PNSCLQQQAS-SYSC------MLPPGSARSYD**

**Crot_Ey3_IMCBch SMGDSYS--SIPPMSTYSM---PN--NMA--PTSCLQQQAS-SYSC------MLPPGSARSYD**

**Tgig_Ey3_IMCBch SMGDSYS--SIPPMSTYSM---PN--NMA--PTSCLQQQAS-SYSC------MLPPGSTRSYD**

**Ttri_Ey3_BBG1sc SMGDSYS--SIPPMSTYSM---PN--NMA--PTSCLQQQAS-SYSC------MLPPGSARSYD**

cons : ::* . : .: . *

Mmus_Pax6_NP_03 --S--------VNGRSYDT-YTP--PHMQTHMNSQ--P-----MGTSGTTSTGLISPGVSVPV

Tcas_toy_EFA028 PLHSLSSSYNSRATACNPA-VAHTQPTT-HPS----YASATTPTSVPASTGTGVISAGVSVPV

Ptep_toy_XP_042 TLS--------LGAYSRAS-CTPAQPMNTHPS----YA-----VSGASPHSAGVISPGVTVPV

**Lpol_toy1_XP_01 PLS--------LGSYSRSS-CTPSQSINGHPS----YS-----VNGGNAHGAGVISPGVTVPL**

**Crot_Toy1_Sc28y --D--------LGSYSRSS-CTPSQSINGHPS----YS-----VNGGSAHGAGVISPGVTVPL**

**Tgig_Toy1_IMCBc --D--------LGSYSRSS-CTPSQSINGHPS----YS-----VNGGSTHGAGVISPGVTVPL**

**Ttri_Toy1_BBG1s --D--------LGSYSRSS-CTPSQSINGHPS----YS-----VNGGSTHGAGVISPGVTVPL**

Lpol_toy2_XP_02 QLT--------LGSYSRPS-CTPSQPINGHAS----YS-----VSASSPHGAGVISPGVTVPL

Crot_Toy2_IMCBc PLT--------LGSYSRPS-CTPSQPINGHPS----YS-----VSTSSPHGAGVISPGVTVPL

Tgig_Toy2_IMCBc PLT--------LGSYSRPS-CTPSQPINGHPS----YS-----VSTSSPHGAGVISPGVTVPL

Ttri_Toy2_BBG1s PIT--------LGSYSRPS-CTPSQPINGHPS----YS-----VSTSSPHGAGVISPGVTVPL

Tcas_ey_XP_0081 -LG--------IGYGSRPSPCSPTQPYQMN---GH--Q-----YNTNGTSSTGLISPGVSVPI

Ptep_ey_XP_0159 PLS--------LGNYTRPT-CPTAQPHVMQPVNSQFPS-----VNNGTAASTGLISPGVSVPV

**Lpol_ey1_XP_022 PLS--------LGSYSRPS-CPTAQPYVMQPVNGQFHT-----VNNASAGSTGLISPGLSVPV**

**Crot_Ey1_IMCBch PLS--------LGSYSRPS-CPTAQPYVMQPVNGQFHT-----VNNGSAGSTGLISPGLSVPV**

**Tgig_Ey1_IMCBch PLS--------LGSYSRPS-CPTAQPYVMQPVNGQFHT-----VNNGSAGSTGLISPGLSVPV**

**Ttri_Ey1_BBG1sc PLS--------LGSYSRPS-CPTAQPYVMQPVNGQFHT-----VNNGSAGSTGLISPGLSVPV**

Lpol_ey2_XP_022 PLS--------LGSYGRPS-CPTAQPYVMQPINGQFAT-----VNNGSAGSTGLISPGLSVPV

Crot_Ey2_IMCBch ALS--------LGTYSRPS-CPTAQPYVMQPVNSQFAT-----VSSGSAGSTGLISPGLSVPV

Tgig_Ey2_IMCBch ALS--------LGTYSRPS-CPTAQPYVMQPVNSQFAT-----VNNGSAGSTGLISPGLSVPV

Ttri_Ey2_BBG1sc ALS--------LGTYSRPS-CPTAQPYVMQPVNSQFAT-----VNNGSAGSTGLISPGLSVPL

**Lpol_ey3_XP_013 HLS--------LSSYSRPS-CPTAQPYVMQPVNGQFST-----VNNGGAGSTGLISPGLSVPV**

**Crot_Ey3_IMCBch HLS--------LTSYSRPS-CPPAQPYVMQPVNGQFSA-----VNNGGTGSTGLISPGLSVPV**

**Tgig_Ey3_IMCBch HLS--------LTSYSRPS-CPTAQPYVMQPVNGQFST-----VNNGGTGSTGLISPGLSVPV**

**Ttri_Ey3_BBG1sc HLS--------LTSYSRPS-CPTAQPYVMQPVNGQFST-----VNNGGTGSTGLISPGLSVPV**

cons : . . . . .:*:**.*::**:

Mmus_Pax6_NP_03 QVPGSEPDM-----SQYWPRLQ

Tcas_toy_EFA028 QIPSQTPDLSTNLASNYWPRIQ

Ptep_toy_XP_042 QVPGQTPDI--SVTSNYWPRIQ

**Lpol_toy1_XP_01 QVPSQGPDL--SMATNYWHRIQ**

**Crot_Toy1_Sc28y QVPSQGPDL--SMATNYWHRIQ**

**Tgig_Toy1_IMCBc QVPSQGPDL--SMATNYWHRIQ**

**Ttri_Toy1_BBG1s QVPSQGPDL--SMATNYWHRIQ**

Lpol_toy2_XP_02 QVPSQGPDL--SMATNYWHRIQ

Crot_Toy2_IMCBc QVPSQGPDL--TMAPNYWHRIQ

Tgig_Toy2_IMCBc QVPSQGPDL--TMATNYWHRIQ

Ttri_Toy2_BBG1s QVPSQGPDL--SMTTNYWHRIQ

Tcas_ey_XP_0081 AVPGQAD-----MTSQYWPRLQ

Ptep_ey_XP_0159 QVPGQSNDL--NMASNYWTRLQ

**Lpol_ey1_XP_022 QVPAQTGEL--NMSSAYWPRIQ**

**Crot_Ey1_IMCBch QVPAQTGEL--NMSSAYWPRIQ**

**Tgig_Ey1_IMCBch QVPAQTGEL--NMSSAYWPRIQ**

**Ttri_Ey1_BBG1sc QVPAQTGEL--NMSSAYWPRIQ**

Lpol_ey2_XP_022 QVPSQPGEL--NMSTAYWPRIQ

Crot_Ey2_IMCBch QVPSQPGEL--NMSTAYWPRIQ

Tgig_Ey2_IMCBch QVPSQPSEL--NMSTAYWPRIQ

Ttri_Ey2_BBG1sc QVPSQPGEL--NMSTAYWPRIQ

**Lpol_ey3_XP_013 QVPGQPGDL--NMSSAYWPRIQ**

**Crot_Ey3_IMCBch QVPGQPADL--NMSSAYWPRIQ**

**Tgig_Ey3_IMCBch QVPGQPADL--NMSSAYWPRIQ**

**Ttri_Ey3_BBG1sc QVPGQPADL--NMTSAYWPRIQ**

cons :*.. . ** *:*
