# Supplementary material for: Evolutionary Conservation of Five Pax6 Homologs under Strong Purifying Selection in the Horseshoe Crab Species Cluster
Source: Preprints.org preprint supplement (doi:10.20944/preprints202309.0246.v1), 2023-09-05
Supplement: Supplementary file 2 [file supplementary › Text document S3_ Protein sequences.docx]

>Lpol_ey1_XP_022246899

MPHKDFDPCRPGPLLQSSVSDPGHSGINQLGGIYVNGRPLPDSTRQKIVELAHSGARPCDISRILQVSNGCVSKILGRYYETGSIRPRAIGGSKPRVATPPVVNKIAQYKRECPSIFAWEIRDRLLSDGICNNDNVPSVSSINRVLRNLAAQKEQQVHAQAQDAVYDKLRILNGQGWPRPNPWYPGSATFGGITSACVPPPVTAPSLPTENGQIQKKEGDSGTESSSRSDPGGSGDEDNAARLRLKRKLQRNRTSFTPEQIEALEKEFERTHYPDVFARERLAAKIDLPEARIQAVSVQVWFSNRRAKWRREEKLRNQRRAAEQAAAAAANTAPARLPLNAGFPNALYPSIGQPMASMTDTYSSIPPMSTYSMSNNMGPSSCLQQQAPSYSCMLPPGSARSYDPLSLGSYSRPSCPTAQPYVMQPVNGQFHTVNNASAGSTGLISPGLSVPVQVPAQTGELNMSSAYWPRIQ

>Crot_Ey1_IMCBchromosome2

MPHKDFDPCRPGPLRQSSVSDPGHSGINQLGGIYVNGRPLPDSTRQKIVELAHSGARPCDISRILQVSNGCVSKILGRYYETGSIRPRAIGGSKPRVATPPVVNKIAQYKRECPSIFAWEIRDRLLSEGICNNDNVPSVSSINRVLRNLAAQKEQQVHAQAQDAVYDKLRILNGQGWPRPNPWYPGSATFGGITPACVPPPVTAPSLPTENGQIQKKEGDSGTESSSRSDPGGSSDEDNAARLRLKRKLQRNRTSFTPEQIEALEKEFERTHYPDVFARERLAAKIDLPEARIQAVSVQVWFSNRRAKWRREEKLRNQRRAAEQAAVAAVNTTPARLPLNAGFPNALYPSIGQPMASMTDTYSSIPPMSTYSMSNNMGPSSCLQQQAPSYSCMLPPGSARSYDPLSLGSYSRPSCPTAQPYVMQPVNGQFHTVNNGSAGSTGLISPGLSVPVQVPAQTGELNMSSAYWPRIQ

>Tgig_Ey1_IMCBchromosome1

MPHKDFDPCRPGPLRQSSVSDPGHSGINQLGGIYVNGRPLPDSTRQKIVELAHSGARPCDISRILQVSNGCVSKILGRYYETGSIRPRAIGGSKPRVATPPVVNKIAQYKRECPSIFAWEIRDRLLSEGICNNDNVPSVSSINRVLRNLAAQKEQQVHAQAQDAVYDKLRILNGQGWPRPNPWYPGSATFGGITPACVPPPVTAPSLPTENGQIQKKEGDSGTESSSRSDPGGSSDEDNAARLRLKRKLQRNRTSFTPEQIEALEKEFERTHYPDVFARERLAAKIDLPEARIQAVSVQVWFSNRRAKWRREEKLRNQRRAAEQAAVAAVNTTPARLPLNAGFPNALYPSIGQPMASMTDTYSSIPPMSTYSMSNNMGPSSCLQQQAPSYSCMLPPGSARSYDPLSLGSYSRPSCPTAQPYVMQPVNGQFHTVNNGSAGSTGLISPGLSVPVQVPAQTGELNMSSAYWPRIQ

>Ttri_Ey1_BBG1scaffold1573

MPHKDFDPCRPGPLRQSSVSDPGHSGINQLGGIYVNGRPLPDSTRQKIVELAHSGARPCDISRILQVSNGCVSKILGRYYETGSIRPRAIGGSKPRVATPPVVNKIAQYKRECPSIFAWEIRDRLLSEGICNNDNVPSVSSINRVLRNLAAQKEQQVHAQAQDAVYDKLRILNGQGWPRPNPWYPGSATFGGITPACVPPPVTAPSLPTENGQIQKKEGDSGTESSSRSDPGGSSDEDNAARLRLKRKLQRNRTSFTPEQIEALEKEFERTHYPDVFARERLAAKIDLPEARIQAVSVQVWFSNRRAKWRREEKLRNQRRAAEQAAVAAVNTTPARLPLNAGFPNALYPSIGQPMASMTDTYSSIPPMSTYSMSNNMGPSSCLQQQAPSYSCMLPPGSARSYDPLSLGSYSRPSCPTAQPYVMQPVNGQFHTVNNGSAGSTGLISPGLSVPVQVPAQTGELNMSSAYWPRIQ

>Lpol_ey2_XP_022239031

MPHKDFDPCRPGPLRQSSITDPGHSGINQLGGIYVNGRPLPDSTRQKIVELAHSGARPCDISRILQVSNGCVSKILGRYYETGSIRPRAIGGSKPRVATPSVVAKIAHYKRECPSIFAWEIRDRLLSDGVCNNDNVPSVSSINRVLRNLAAKKEQQAQDTVYDKLRLLNGQAWPRPNPWYPGSATFGGITPACIPPPITASGHHSDNGQVQKKEGDSGNDSSSRSDPGGSGDEDNEARLRLKRKLQRNRTSFTPEQIEALEKEFERTHYPDVFARERLAAKIDLPEARIQALSVQVWFSNRRAKWRREEKLRNQRRVAEQAAVAAAAANSTPARLSLNSGFPNALYPGIGQPMASMTDSYSSIPPMSTYSMSNNMAPSSCLQQQTPSYSCMLPSGSARNYDPLSLGSYGRPSCPTAQPYVMQPINGQFATVNNGSAGSTGLISPGLSVPVQVPSQPGELNMSTAYWPRIQ

>Crot_Ey2_IMCBchromosome11

MPHKDFDPCRPGPLCQSSITDPGHSGINQLGGIYVNGRPLPDSTRQKIVELAHSGARPCDISRILQVSNGCVSKILGRYYETGSIRPRAIGGSKPRVATPPVVAKIAHYKRECPSIFAWEIRDRLLSDGVCSNDNVPSVSSINRVLRNLAAKKEQQAQDTVYDKLRLLNGQGWPRPNPWYPGSATFGGITPACIPPPITVSGLPSDSGQVQKKEGGSVHDSSSRSDPGVSGDEENEARLRLKRKLQRNRTSFTPEQIEALEKEFERTHYPDVFARERLAAKIDLPEARIQALSVQVWFSNRRAKWRREEKLRNQRRVAEQAAVAAAAANSAPTRLSLNSGFPNSLYPGIGQPMASMTDSYNSIPPMSTYSMSNNMAPSSCLQQQTPSYSCMLPSGNARNYDALSLGTYSRPSCPTAQPYVMQPVNSQFATVSSGSAGSTGLISPGLSVPVQVPSQPGELNMSTAYWPRIQ

>Tgig_Ey2_IMCBchromosome4

MPHKDFDPCRPDPLRQSSIADPGHSGINQLGGIYVNGRPLPDSTRQKIVELAHSGARPCDISRILQVSNGCVSKILGRYYETGSIRPRAIGGSKPRVATPPVVAKIAHYKRECPSIFAWEIRDRLLSDGVCSNDNVPSVSSINRVLRNLAAKKEQQTQDTVYDKLRLLNGQGWPRPNPWYPGSATFGGITPACIPPPITVSGLPSDSGQVQKKEGDSVHDSSSRSDPGGSGDEENEARLRLKRKLQRNRTSFTPEQIEALEKEFERTHYPDVFARERLAAKIDLPEARIQALSVQVWFSNRRAKWRREEKLRNQRRVAEQAAVAAAAANSAPTRLSLNSGFPNSLYPGIGQPMASMTDSYNSIPPMSTYSMSNNIAPSSCLQQQTPSYSCMLPSGSARNYDALSLGTYSRPSCPTAQPYVMQPVNSQFATVNNGSAGSTGLISPGLSVPVQVPSQPSELNMSTAYWPRIQ

>Ttri_Ey2_BBG1scaffold3997

MPHKDFDPCRPGPLRQSSIADPGHSGINQLGGIYVNGRPLPDSTRQKIVELAHSGARPCDISRILQVSNGCVSKILGRYYETGSIRPRAIGGSKPRVATPPVVAKIAHYKRECPSIFAWEIRDRLLSDGVCSNDNVPSVSSINRVLRNLAAKKEQQAQDTVYDKLRLLNGQGWPRPNPWYPGSATFGGITPTCIPPPITVSGLPSDSGQVQKKEGGSVHDSSSRSDPGGSGDEENEARLRLKRKLQRNRTSFTPEQIEALEKEFERTHYPDVFARERLAAKIDLPEARIQALSVQVWFSNRRAKWRREEKLRNQRRVAEQAAVAAAAANSAPTRLSLNSGFPNSLYPGIGQPMASMTDSYNSIPPMSTYSMSNNMAPSSCLQQQTPSYSCMLPSGSARNYDALSLGTYSRPSCPTAQPYVMQPVNSQFATVNNGSAGSTGLISPGLSVPLQVPSQPGELNMSTAYWPRIQ

>Lpol_ey3_XP_013784383_022252542

MLLFPPGHSGINQLGGIYVNGRPLPDSTRQKIVELAHSGARPCDISRILQVSNGCVSKILGRYYETGSIRPRAIGGSKPRVATPDVVSNIAQYKRECPSIFAWEIRDRLLSDGICTNDNVP**SV**SSINRVLRNLAAQKEQHVHAQDAVYDKLRMLNGQGWPRPNPWYPASATFGGITPACVPPPVTVPGLSTENGPIQKKEGDSGTESSSRSDPGGSGDDEENAARLRLKRKLQRNRTSFTPEQIEALEKEFERTHYPDVFARERLASKIDLPEARIQVWFSNRRAKWRREEKLRNQRRAAEQAAAAAAAVNTTPGRLPLNSGFPNSLYPGIGQPMASMGDSYSSIPPMSTYSMPNNMAPNSCLQQQASSYSCMLPPGSARSYDHLSLSSYSRPSCPTAQPYVMQPVNGQFSTVNNGGAGSTGLISPGLSVPVQVPGQPGDLNMSSAYWPRIQ

>Crot_Ey3_IMCBchromosome7

MLLFPPGHSGINQLGGIYVNGRPLPDSTRQKIVELAHSGARPCDISRILQVSNGCVSKILGRYYETGSIRPRAIGGSKPRVATPDVVSNIAQYKRECPSIFAWEIRDRLLSDGICTNDNVPSVSSINRVLRNLAAQKEQHVQAQAQDAVYDKLRMLNGQGWPRPNPWYPASATFGGLTPACVPPPVTVPGLSTENGPIQKKEGDSGTESSSRSDPGGSGDDEENAARLRLKRKLQRNRTSFTPEQIEALEKEFERTHYPDVFARERLASKIDLPEARIQVWFSNRRAKWRREEKLRNQRRAAEQAAAAVNNTPGRLPLNSGFPNSLYPGIGQPMASMGDSYSSIPPMSTYSMPNNMAPTSCLQQQASSYSCMLPPGSARSYDHLSLTSYSRPSCPPAQPYVMQPVNGQFSAVNNGGTGSTGLISPGLSVPVQVPGQPADLNMSSAYWPRIQ

>Tgig_Ey3_IMCBchromosome4

MLLFPPGHSGINQLGGIYVNGRPLPDSTRQKIVELAHSGARPCDISRILQVSNGCVSKILGRYYETGSIRPRAIGGSKPRVATPDVVSNIAQYKRECPSIFAWEIRDRLLSDGICTNDNVPSVSSINRVLRNLAAQKEQHVQAQAQDAVYDKLRMLNGQGWPRPNPWYPASATFGGLTPACVPPPVTVPGLSTENGPIQKKEGDSGTESSSRSDPGGSGDDEENAARLRLKRKLQRNRTSFTPEQIEALEKEFERTHYPDVFARERLASKIDLPEARIQVWFSNRRAKWRREEKLRNQRRAAEQAAAAVNNTPGRLPLNSGFPNSLYPGIGQPMASMGDSYSSIPPMSTYSMPNNMAPTSCLQQQASSYSCMLPPGSTRSYDHLSLTSYSRPSCPTAQPYVMQPVNGQFSTVNNGGTGSTGLISPGLSVPVQVPGQPADLNMSSAYWPRIQ

>Ttri_Ey3_BBG1scaffold2275

MLLFPPGHSGINQLGGIYVNGRPLPDSTRQKIVELAHSGARPCDISRILQVSNGCVSKILGRYYETGSIRPRAIGGSKPRVATPDVVSNIAQYKRECPSIFAWEIRDRLLSDGICTNDNVPSVSSINRVLRNLAAQKEQHVQAQAQDAVYDKLRMLNGQGWPRPNPWYPASATFGGLTPACVPPPVTVPGLSTENGPIQKKEGDSGTESSSRSDPGGSGDDEENAARLRLKRKLQRNRTSFTPEQIEALEKEFERTHYPDVFARERLASKIDLPEARIQVWFSNRRAKWRREEKLRNQRRAAEQAAAAVNNTPGRLPLNSGFPNSLYPGIGQPMASMGDSYSSIPPMSTYSMPNNMAPTSCLQQQASSYSCMLPPGSARSYDHLSLTSYSRPSCPTAQPYVMQPVNGQFSTVNNGGTGSTGLISPGLSVPVQVPGQPADLNMTSAYWPRIQ

>Lpol_toy1_XP_013792934

MPHKGHSGVNQLGGVYVNGRPLPDSTRQKIVELAHSGARPCDISRILQVSNGCVSKILGRYYETGSIKPRTIGGSKPRVATSAVVNKIADYKRECPSVFAWEIRDRLLADGVCNSENIPSVSSINRVLRNLTSQKDQQEPSPHHVPMTGPESVYDKLRLLNGSQPWPWYPTGPTHHFHGIPPTSSPVALGQNAGLVGPVHGGNGHPSLAACESHRQDHPSVKKDSIDATSDGNSENNSSADEDSQLRMRLKRKLQRNRTSFTNEQIEALEKEFERTHYPDVFARERLAEKITLPEARIQVWFSNRRAKWRREEKLRNQRRVVEQPTGTTVLAPPNGRLPINGTFYNSMYPSLGQPMGGMGDSYSMPPSSSMTSNHCLQQRDPTSYTYMFHDPLSLGSYSRSSCTPSQSINGHPSYSVNGGNAHGAGVISPGVTVPLQVPSQGPDLSMATNYWHRIQ

>Crot_Toy1_Sc28yqQ4222

MPHKGHSGVNQLGGVYVNGRPLPDSTRQKIVELAHSGARPCDISRILQVSNGCVSKILGRYYETGSIKPRTIGGSKPRVATSTVVNKIADYKRECPSVFAWEIRDRLLADGVCNSENVPSVSSINRVLRNLTSQKDQQETSPHHVPMTGPESVYDKLRLLNGSQPWPWYPTGPSHHFHGIPPTSSSVALGQNAGLMGPGHGGNSHLGLSACESHRQDHPSVKKDSIDATSDGNSENNSSADEDSQLRMRLKRKLQRNRTSFTNEQIEALEKEFERTHYPDVFARERLAEKVTLPEARIQVWFSNRRAKWRREEKLRNQRRAVEQPTGTTVLAPPNGRLPINGTFYNSMYPSLGQPMAGMGDSYSVPPPSSIAPNHCVQQRDPTSYTYMFHDLGSYSRSSCTPSQSINGHPSYSVNGGSAHGAGVISPGVTVPLQVPSQGPDLSMATNYWHRIQ

>Tgig_Toy1_IMCBchromosome6

MPHKGHSGVNQLGGVYVNGRPLPDSTRQKIVELAHSGARPCDISRILQVSNGCVSKILGRYYETGSIKPRTIGGSKPRVATSTVVNKIADYKRECPSVFAWEIRDRLLADGVCNSENVPSVSSINRVLRNLTSQKDQQETSPHHVPMTGPESVYDKLRLLNGSQPWPWYPTGPSHHFHGIPPTSSPVALGQNAGLMGPGHGGNSHLGLAACESHRQDHPSVKKDSIDATSDGNSENNSSADEDSQLRMRLKRKLQRNRTSFTNEQIEALEKEFERTHYPDVFARERLAEKVTLPEARIQVWFSNRRAKWRREEKLRNQRRVVEQPTGTTVLAPPNGRLPINGTFYNSMYPSLGQPMAGMGDSYSVPPSSIAPNHCVQQRDPTSYTYMFHDLGSYSRSSCTPSQSINGHPSYSVNGGSTHGAGVISPGVTVPLQVPSQGPDLSMATNYWHRIQ

>Ttri_Toy1_BBG1scaffold1101

MPHKGHSGVNQLGGVYVNGRPLPDSTRQKIVELAHSGARPCDISRILQVSNGCVSKILGRYYETGSIKPRTIGGSKPRVATSTVVNKIADYKRECPSVFAWEIRDRLLADGVCNSENVPSVSSINRVLRNLTSQKDQQETSPHHVPMTGPESVYDKLRLLNGSQPWPWYPTGPSHHFHGIPPTSSPVALGQNAGLMGPGHGGNSHLGLAACESHRQDHPRVKKDSIDATSDGNSENNSSADEDSQLRMRLKRKLQRNRTSFTNEQIEALEKEFERTHYPDVFARERLAEKVTLPEARIQVWFSNRRAKWRREEKLRNQRRVVEQPTGTTVLAPPNGRLPINGTFYNSMYPSLGQPMAGMGDSYSVPPPSSIAPNHCVQQRDPTSYTYMFHDLGSYSRSSCTPSQSINGHPSYSVNGGSTHGAGVISPGVTVPLQVPSQGPDLSMATNYWHRIQ

>Lpol_toy2_XP_022240121

mphkSHSGVNQLGGMYVNGRPLPDSTRQKIVELAHSGARPCDISRILQVSNGCVSKILGRYYETGSIKPRTIGGSKPRVATAAVVNRIADYKRECPSIFAWEMRDRLLADGVCNSENIPSVSSINRVLRNLSAQKDHHQSSPQVPMTGPESVYDKLRMLNGAQPWPWYPTGTSHHFHGVPPPSSPVTLGPNTGLGGSVPIVNGHSSLGSCDSHRHDHMSVTKKDSIDATSDGNSENNSSADEDSQLRMRLKRKLQRNRTSFTNEQIEALEKEFERTHYPDVFARERLAEKISLPEARIQVWFSNRRAKWRREEKLRNQRRVIEQPACTSMLSPPNGRLPINGSFYNSMYPSLAQPLGGMGDSYSVPPASSVASNHCLQQRDPSSYTYMFHDQLTLGSYSRPSCTPSQPINGHASYSVSASSPHGAGVISPGVTVPLQVPSQGPDLSMATNYWHRIQ

>Crot_Toy2_IMCBchromosome1

MPHKGHSGVNQLGGMYVNGRPLPDSTRQKIVELAHSGARPCDISRILQVSNGCVSKILGRYYETGSIKPRTIGGSKPRVATAAVVNRIADYKRECPSIFAWEMRDRLLVEGVCNSENIPSVSSINRVLRNLSSQKDLHRTSPQVSMAGPETVYDKLRMLNGTQPWPWYPTGTSHHFHGVPPPSSPVTLGPNTGLGGSVPIGNGHSSIGSCETNRHDHVNVTKKGSIDATSDGNSENNSSADEDSQLRMRLKRKLQRNRTSFTNEQIEALEKVERTHYPDVFARERLAEKISLPEARIQVWFSNRRAKWRREEKLRNQRRVIEQPACTSMLSPPNGRLPINGSFYNSLYPALAQPMGGMGDSYSVPPASSMASNHCLQQRDPSPYTYMFHDPLTLGSYSRPSCTPSQPINGHPSYSVSTSSPHGAGVISPGVTVPLQVPSQGPDLTMAPNYWHRIQ

>Tgig_Toy2_IMCBchromosome2

MPHKGHSGVNQLGGMYVNGRPLPDSTRQKIVELAHSGARPCDISRILQVSNGCVSKILGRYYETGSIKPRTIGGSKPRVATAAVVNRIADYKRECPSIFAWEMRDRLLVEGVCNSENIPSVSSINRVLRNLSSQKDPHRTSPQVSVGGPESVYDKLRMLNGAQPWPWYPTGTSHHFHGVPPPSSPVTLGPNTGLGGSVPIGNGHSSLGVCESNRHDHMNVTKKGSIDATSDGNSENNSSADEDSQLRMRLKRKLQRNRTSFTNEQIEALEKEFERTHYPDVFARERLAEKISLPEARIQVWFSNRRAKWRREEKLRNQRRVIEQPTCTSMLSPPNGRLPINGSFYNSMYPALAQPMGGMGDSYSVPPVSSMASNHCLQQRDPSSYTYMFHDPLTLGSYSRPSCTPSQPINGHPSYSVSTSSPHGAGVISPGVTVPLQVPSQGPDLTMATNYWHRIQ

>Ttri_Toy2_BBG1scaffold627665

MPHKGHSGVNQLGGMYVNGRPLPDSTRQKIVELAHSGARPCDISRILQVSNGCVSKILGRYYETGSIKPRTIGGSKPRVATAAVVNRIADYKRECPSIFAWEMRDRLLVEGVCNSENIPSVSSINRVLRNLSSQKDPHRTSPQVSMAGPETVYDKLRMLNGAQPWPWYPTATSHHFHGVPPPSSPVTLGPNTGLGVSVPIGNGHSSLGSCESNRHDHMHVTKKGSIDATSDGNSENNSSADEDSQLRMRLKRKLQRNRTSFTNEQIEALEKEFERTHYPDVFARERLAEKISLPEARIQVWFSNRRAKWRREEKLRNQRRVIEQPACTSMLSPPNGRLPINGSFYNSMYPALAQPMGGMGDSYSVPPVSSMASNHCLQQRDPSSYTYMFHDPITLGSYSRPSCTPSQPINGHPSYSVSTSSPHGAGVISPGVTVPLQVPSQGPDLSMTTNYWHRIQ
